# Supplementary material for: Clinical and Lifestyle Factors and Risk of Amyotrophic Lateral Sclerosis: A Population-Based Case-Control Study
Source: Int J Environ Res Public Health. 2020 Jan 30;17(3):857. doi: 10.3390/ijerph17030857 (PMC7037077; doi:10.3390/ijerph17030857)
Supplement: Supplementary file 1 [file ijerph-17-00857-s001.pdf]

## SUPPLEMENTAL MATERIAL

**Table S1.** Odds ratio (OR) with 95% confidence interval (CI) of ALS risk according to personal characteristics and clinical factors without subjects with a family history of ALS.

| Factor                                                    | Cases<br>(y/n) | Controls<br>(y/n) | OR <sup>a</sup> | OR <sup>b</sup> | (95% CI)     |
|-----------------------------------------------------------|----------------|-------------------|-----------------|-----------------|--------------|
| <b>Personal information and habits</b>                    |                |                   |                 |                 |              |
| Dominant hand                                             |                |                   |                 |                 |              |
| Right-handed                                              | 79             | 122               | Ref.            |                 |              |
| Left-handed                                               | 4              | 4                 | 1.54            | 1.47            | (0.35-6.24)  |
| Ambidextrous                                              | 7              | 7                 | 1.54            | 1.58            | (0.52-4.76)  |
| Non-right handed                                          | 11/79          | 11/122            | 1.54            | 1.54            | (0.63-3.79)  |
| Dominant foot                                             |                |                   |                 |                 |              |
| Right-handed                                              | 79             | 121               | Ref.            |                 |              |
| Left-handed                                               | 10             | 10                | 1.53            | 1.57            | (0.61-4.00)  |
| Ambidextrous                                              | 1              | 2                 | 0.77            | 0.78            | (0.07-8.91)  |
| Non-right handed                                          | 11/79          | 12/121            | 1.40            | 1.43            | (0.59-3.45)  |
| Regular use of skin cream <sup>c</sup>                    | 25/41          | 64/68             | 0.65            | 0.56            | (0.28-1.11)  |
| Having or ever had amalgam fillings <sup>c</sup>          | 40/26          | 78/54             | 1.07            | 1.11            | (0.59-2.10)  |
| Regular use of chewing gum <sup>c</sup>                   | 15/51          | 17/115            | 1.99            | 2.09            | (0.92-4.74)  |
| Eat fish <sup>c</sup>                                     | 47/19          | 118/14            | 0.29            | 0.30            | (0.13-0.66)  |
| Eat ≥3 fish-based meals per week <sup>c</sup>             | 6/60           | 18/114            | 0.63            | 0.60            | (0.22-1.62)  |
| Wine drinking <sup>c</sup>                                | 42/48          | 84/49             | 0.51            | 0.50            | (0.28-0.90)  |
| Alcohol unit drinking <sup>c,d</sup>                      | 10/56          | 21/111            | 0.94            | 1.01            | (0.43-2.37)  |
| Main source of drinking water                             |                |                   |                 |                 |              |
| No preference                                             | 34             | 45                | Ref.            | Ref.            |              |
| Municipal water                                           | 22             | 55                | 0.53            | 0.48            | (0.24-0.95)  |
| Private wells                                             | 4              | 3                 | 1.76            | 1.38            | (0.28-6.78)  |
| Bottled water                                             | 30             | 30                | 1.32            | 1.15            | (0.57-2.31)  |
| Current use of any private well water                     | 12/78          | 9/124             | 2.12            | 1.99            | (0.79-4.99)  |
| Have ever used a private well/fountain for drinking water | 36/54          | 45/88             | 1.30            | 1.28            | (0.72-2.29)  |
| Current use of a private well/fountain for irrigation     | 14/76          | 30/103            | 0.63            | 0.59            | (0.29-1.21)  |
| Ever smoking                                              | 46/44          | 64/69             | 1.13            | 1.22            | (0.68-2.17)  |
| Current smoking                                           | 10/80          | 14/119            | 1.06            | 1.08            | (0.44-2.66)  |
| Use of dietary supplements in the former 20 years:        | 22/68          | 46/87             | 0.61            | 0.59            | (0.32-1.08)  |
| Vitamin supplements                                       | 13/77          | 29/104            | 0.61            | 0.60            | (0.28-1.26)  |
| Vitamin and mineral supplements                           | 14/76          | 27/106            | 0.72            | 0.64            | (0.31-1.32)  |
| Aminoacidic supplements                                   | 3/87           | 2/131             | 2.26            | 2.37            | (0.36-15.73) |
| Energy drinks                                             | 7/83           | 11/122            | 0.94            | 0.99            | (0.34-2.83)  |
| Selenium-containing supplements                           | 21/69          | 36/97             | 0.82            | 0.85            | (0.44-1.61)  |
| <b>Clinical history</b>                                   |                |                   |                 |                 |              |
| Any trauma requesting medical evaluation                  | 33/57          | 49/84             | 0.99            | 1.13            | (0.63-2.01)  |
| Head trauma                                               | 17/73          | 13/120            | 2.15            | 2.44            | (1.09-5.45)  |
| Trunk trauma                                              | 9/81           | 8/125             | 1.74            | 1.81            | (0.65-4.99)  |
| Arm trauma                                                | 15/75          | 39/94             | 0.48            | 0.51            | (0.26-1.02)  |
| Any fracture                                              | 34/56          | 54/79             | 0.89            | 0.90            | (0.52-1.58)  |
| Head fracture                                             | 3/87           | 1/132             | 4.55            | 4.26            | (0.42-43.27) |
| Trunk fracture                                            | 6/84           | 10/123            | 0.88            | 0.96            | (0.33-2.84)  |
| Arm fracture                                              | 26/64          | 45/88             | 0.79            | 0.79            | (0.43-1.43)  |
| Electric shock trauma                                     | 7/83           | 5/128             | 2.16            | 2.32            | (0.68-7.86)  |
| Previous Polio vaccine                                    | 39/51          | 65/68             | 0.80            | 0.78            | (0.43-1.42)  |
| Previous spinal anesthesia                                | 23/67          | 35/98             | 0.96            | 0.98            | (0.52-1.83)  |
| Ever been blood donor                                     | 23/67          | 35/98             | 0.96            | 1.11            | (0.58-2.12)  |

|                         |       |        |      |      |             |
|-------------------------|-------|--------|------|------|-------------|
| Any surgery             | 73/17 | 112/21 | 0.81 | 0.77 | (0.37-1.60) |
| with general anesthesia | 22/51 | 34/78  | 0.99 | 1.00 | (0.52-1.92) |

<sup>a</sup>Crude model; <sup>b</sup>Model adjusted by sex, age, and educational attainment; <sup>c</sup>Section missing for 25 subjects due to pilot version of the questionnaire. Analysis performed in 198 participants only (66 cases/132 controls);

<sup>d</sup>Recommended alcohol units (two alcohol units in men, one unit in women) used as cutpoints.

**Table S2.** Odds ratio (OR) with 95% confidence interval (CI) of ALS risk according to leisure activities and other lifestyle factors without subjects with a family history of ALS.

| Factor                             | Cases<br>(y/n) | Controls<br>(y/n) | OR <sup>a</sup> | OR <sup>b</sup> | (95% CI)     |
|------------------------------------|----------------|-------------------|-----------------|-----------------|--------------|
| Hunting                            | 4/86           | 6/127             | 0.98            | 1.13            | (0.29-4.40)  |
| Fishing                            | 20/70          | 37/96             | 0.74            | 0.69            | (0.33-1.43)  |
| Using lead                         | 16/74          | 32/101            | 0.68            | 0.65            | (0.30-1.40)  |
| Using lead in fishermen only       | 16/4           | 32/5              | 0.62            | 0.86            | (0.15-4.75)  |
| Painting                           | 6/84           | 13/120            | 0.66            | 0.74            | (0.26-2.10)  |
| Use of oil paints                  | 2/88           | 8/125             | 0.36            | 0.41            | (0.08-2.06)  |
| Use of oil paints in painters only | 2/4            | 8/5               | 0.31            | 0.43            | (0.04-4.90)  |
| Model-making                       | 7/83           | 8/125             | 1.32            | 1.51            | (0.50-4.54)  |
| Gardening                          | 41/49          | 63/70             | 0.93            | 1.04            | (0.60-1.80)  |
| Any use of pesticides?             | 20/70          | 26/107            | 1.18            | 1.25            | (0.64-2.44)  |
| Using pesticides for gardening?    | 16/74          | 19/114            | 1.30            | 1.41            | (0.67-2.99)  |
| Using herbicides for gardening?    | 16/74          | 13/120            | 2.00            | 2.07            | (0.92-4.62)  |
| Using fungicides for gardening?    | 7/83           | 11/122            | 0.94            | 1.08            | (0.40-2.97)  |
| Photograph darkroom printing?      | 4/86           | 24/109            | 0.21            | 0.21            | (0.07-0.65)  |
| Play Sports                        | 37/53          | 63/70             | 0.78            | 0.85            | (0.45-1.60)  |
| Play competitive sports            | 9/81           | 22/111            | 0.56            | 0.49            | (0.21-1.17)  |
| Play soccer                        | 13/77          | 21/112            | 0.90            | 0.78            | (0.34-1.81)  |
| Play competitive soccer            | 5/85           | 6/127             | 1.25            | 1.05            | (0.30-3.76)  |
| Play volleyball                    | 5/85           | 11/122            | 0.65            | 0.63            | (0.20-2.00)  |
| Play competitive volleyball        | 1/89           | 4/129             | 0.36            | 0.31            | (0.03-2.92)  |
| Cycling                            | 4/86           | 7/126             | 0.84            | 0.88            | (0.24-3.29)  |
| Competitive cycling                | 1/89           | 4/129             | 0.36            | 0.34            | (0.04-3.21)  |
| Swimming                           | 4/86           | 7/126             | 0.84            | 1.03            | (0.26-4.01)  |
| Competitive swimming               | 1/89           | 1/132             | 1.48            | 1.84            | (0.11-31.29) |
| Skiing                             | 4/86           | 7/126             | 0.84            | 1.31            | (0.35-4.94)  |
| Competitive skiing                 | 0/90           | 0/135             | -               | -               |              |
| Play athletics                     | 7/83           | 16/117            | 0.62            | 0.71            | (0.27-1.85)  |
| Competitive athletics              | 0/90           | 6/127             | -               | -               |              |
| Play tennis                        | 3/87           | 7/126             | 0.62            | 0.81            | (0.19-3.34)  |
| Play competitive tennis            | 1/89           | 0/133             | -               | -               |              |

<sup>a</sup>Crude model; <sup>b</sup>Adjusted by sex, age, and educational attainment; CI: confidence interval; OR: odds ratio.

**Table S3.** Odds ratio (OR) with 95% confidence interval (CI) of ALS risk according to personal characteristics and clinical factors in men.

| Factor                                                    | Cases<br>(y/n) | Controls<br>(y/n) | OR <sup>a</sup> | OR <sup>b</sup> | (95% CI)     |
|-----------------------------------------------------------|----------------|-------------------|-----------------|-----------------|--------------|
| <b>Personal information and habits</b>                    |                |                   |                 |                 |              |
| Dominant hand                                             |                |                   |                 |                 |              |
| Right-handed                                              | 44             | 65                | Ref.            |                 |              |
| Left-handed                                               | 3              | 2                 | 2.22            | 2.33            | (0.35-15.63) |
| Ambidextrous                                              | 4              | 4                 | 1.48            | 1.46            | (0.34-6.40)  |
| Non-right handed                                          | 7/44           | 6/65              | 1.72            | 1.74            | (0.53-5.72)  |
| Dominant foot                                             |                |                   |                 |                 |              |
| Right-handed                                              | 43             | 64                | Ref.            |                 |              |
| Left-handed                                               | 8              | 6                 | 1.98            | 1.88            | (0.59-6.00)  |
| Ambidextrous                                              | 0              | 1                 | -               | -               |              |
| Non-right handed                                          | 8/43           | 7/64              | 1.70            | 1.62            | (0.53-4.94)  |
| Regular use of skin cream <sup>c</sup>                    | 7/32           | 20/51             | 0.56            | 0.47            | (0.17-1.29)  |
| Having or ever had amalgam fillings <sup>c</sup>          | 26/13          | 40/31             | 1.55            | 1.80            | (0.75-4.32)  |
| Regular use of chewing gum <sup>c</sup>                   | 10/29          | 11/60             | 1.88            | 2.18            | (0.72-6.58)  |
| Eat fish <sup>c</sup>                                     | 30/9           | 66/5              | 0.25            | 0.28            | (0.09-0.94)  |
| Eat ≥3 fish-based meals per week <sup>c</sup>             | 3/36           | 12/59             | 0.41            | 0.37            | (0.09-1.43)  |
| Wine drinking <sup>c</sup>                                | 29/22          | 56/15             | 0.35            | 0.36            | (0.16-0.82)  |
| Alcohol unit intake <sup>c,d</sup>                        | 5/34           | 11/60             | 0.80            | 0.79            | (0.24-2.62)  |
| Main source of drinking water                             |                |                   |                 |                 |              |
| No preference                                             | 19             | 23                | Ref.            | Ref.            |              |
| Municipal water                                           | 12             | 29                | 0.50            | 0.48            | (0.19-1.23)  |
| Private wells                                             | 3              | 0                 | -               | -               |              |
| Bottled water                                             | 17             | 19                | 1.08            | 0.95            | (0.19-1.23)  |
| Current use of any private well water                     | 8/43           | 3/68              | 4.22            | 3.93            | (0.96-16.13) |
| Have ever used a private well/fountain for drinking water | 23/28          | 18/53             | 2.42            | 2.69            | (1.18-6.12)  |
| Current use of a private well/fountain for irrigation     | 9/42           | 12/59             | 1.05            | 0.94            | (0.35-2.55)  |
| Ever smoking                                              | 30/21          | 47/24             | 0.73            | 0.75            | (0.35-1.62)  |
| Current smoking                                           | 7/44           | 8&63              | 1.25            | 1.25            | (0.40-3.90)  |
| Use of dietary supplements in the former 20 years:        | 17/34          | 20/51             | 1.28            | 1.26            | (0.55-2.87)  |
| Vitamin supplements                                       | 10/41          | 9/62              | 1.68            | 1.89            | (0.66-5.36)  |
| Vitamin and mineral supplements                           | 8/43           | 12/59             | 0.91            | 0.75            | (0.26-2.11)  |
| Aminoacidic supplements                                   | 3/48           | 1/70              | 4.37            | 2.98            | (0.27-32.68) |
| Energy drinks                                             | 6/45           | 10/61             | 0.81            | 0.85            | (0.26-2.73)  |
| Selenium-containing supplements                           | 13/48          | 14/57             | 1.39            | 1.44            | (0.59-2.55)  |
| <b>Clinical history</b>                                   |                |                   |                 |                 |              |
| Any trauma requesting medical evaluation                  | 19/32          | 30/41             | 0.81            | 0.86            | (0.39-1.90)  |
| Head trauma                                               | 12/39          | 7/64              | 2.81            | 3.35            | (1.15-9.75)  |
| Trunk trauma                                              | 4/47           | 3/68              | 1.93            | 2.21            | (0.45-10.81) |
| Arm trauma                                                | 6/45           | 25/46             | 0.25            | 0.21            | (0.08-6.61)  |
| Any fracture                                              | 15/36          | 30/41             | 0.57            | 0.62            | (0.28-1.37)  |
| Head fracture                                             | 2/49           | 1/70              | 2.86            | 3.15            | (0.26-38.38) |
| Trunk fracture                                            | 4/47           | 6/65              | 0.92            | 1.19            | (0.29-4.82)  |
| Arm fracture                                              | 9/42           | 25/46             | 0.39            | 0.39            | (0.16-0.97)  |
| Electric shock trauma                                     | 7/44           | 4/67              | 2.66            | 2.69            | (0.72-10.07) |
| Previous Polio vaccine                                    | 26/25          | 38/33             | 0.90            | 0.81            | (0.37-1.79)  |
| Previous spinal anesthesia                                | 12/39          | 25/46             | 0.57            | 0.61            | (0.26-1.41)  |
| Ever been blood donor                                     | 17/34          | 23/48             | 1.04            | 1.12            | (0.50-2.54)  |
| Any surgery                                               | 40/11          | 61/10             | 0.60            | 0.65            | (0.23-1.79)  |
| with general anesthesia                                   | 11/29          | 24/37             | 0.58            | 0.58            | (0.24-1.43)  |

<sup>a</sup>Crude model; <sup>b</sup>Model adjusted by age, and educational attainment; <sup>c</sup>Section missing for 12 subjects due to pilot version of the questionnaire. Analysis performed in 122 participants only (39 cases/71 controls); <sup>d</sup>Recommended alcohol units (two alcohol units in men, one unit in women) used as cutpoints.

**Table S4.** Odds ratio (OR) with 95% confidence interval (CI) of ALS risk according to personal characteristics and clinical factors in women.

| Factor                                                    | Cases<br>(y/n) | Controls<br>(y/n) | OR <sup>a</sup> | OR <sup>b</sup> | (95% CI)     |
|-----------------------------------------------------------|----------------|-------------------|-----------------|-----------------|--------------|
| <b>Personal information and habits</b>                    |                |                   |                 |                 |              |
| Dominant hand                                             |                |                   |                 |                 |              |
| Right-handed                                              | 39             | 59                | Ref.            |                 |              |
| Left-handed                                               | 1              | 2                 | 0.76            | 0.75            | (0.06-9.24)  |
| Ambidextrous                                              | 4              | 3                 | 2.02            | 1.94            | (0.39-9.50)  |
| Non-right handed                                          | 5/39           | 5/59              | 1.51            | 1.46            | (0.39-5.50)  |
| Dominant foot                                             |                |                   |                 |                 |              |
| Right-handed                                              | 40             | 59                | Ref.            |                 |              |
| Left-handed                                               | 3              | 4                 | 1.11            | 1.19            | (0.24-5.89)  |
| Ambidextrous                                              | 1              | 1                 | 1.48            | 1.37            | (0.08-23.38) |
| Non-right handed                                          | 4/40           | 5/59              | 1.18            | 1.23            | (0.31-4.97)  |
| Regular use of skin cream <sup>c</sup>                    | 18/11          | 46/17             | 0.60            | 0.59            | (0.23-1.51)  |
| Having or ever had amalgam fillings <sup>c</sup>          | 16/13          | 39/24             | 0.76            | 0.72            | (0.28-1.84)  |
| Regular use of chewing gum <sup>c</sup>                   | 6/23           | 7/56              | 2.09            | 2.12            | (0.62-7.21)  |
| Eat fish <sup>c</sup>                                     | 18/11          | 54/9              | 0.27            | 0.25            | (0.09-0.74)  |
| Eat ≥3 fish-based meals per week <sup>c</sup>             | 3/26           | 6/57              | 1.10            | 1.12            | (0.24-5.17)  |
| Wine drinking <sup>c</sup>                                | 14/30          | 29/35             | 0.56            | 0.55            | (0.24-1.25)  |
| Alcohol unit intake <sup>c,d</sup>                        | 5/24           | 10/53             | 1.10            | 1.18            | (0.35-4.02)  |
| Main source of drinking water                             |                |                   |                 |                 |              |
| No preference                                             | 23             | 15                | Ref.            | Ref.            |              |
| Municipal water                                           | 26             | 12                | 0.71            | 0.67            | (0.25-1.78)  |
| Private wells                                             | 3              | 1                 | 0.51            | 0.45            | (0.04-5.08)  |
| Bottled water                                             | 12             | 16                | 2.04            | 1.84            | (0.63-5.32)  |
| Current use of any private well water                     | 4/40           | 6/58              | 0.97            | 0.90            | (0.23-3.49)  |
| Have ever used a private well/fountain for drinking water | 15/29          | 28/36             | 0.67            | 0.56            | (0.24-1.33)  |
| Current use of a private well/fountain for irrigation     | 5/39           | 18/46             | 0.33            | 0.28            | (0.09-0.85)  |
| Ever smoking                                              | 19/25          | 18/46             | 1.94            | 2.14            | (0.92-4.94)  |
| Current smoking                                           | 4/40           | 7/57              | 0.81            | 0.79            | (0.20-3.02)  |
| Use of dietary supplements in the former 20 years:        | 9/35           | 26/38             | 0.38            | 0.35            | (0.14-0.87)  |
| Vitamin supplements                                       | 7/37           | 20/44             | 0.42            | 0.40            | (0.15-1.07)  |
| Vitamin and mineral supplements                           | 8/36           | 15/49             | 0.73            | 0.68            | (0.25-1.84)  |
| Aminoacidic supplements                                   | 1/43           | 1/63              | 1.47            | 1.80            | (0.10-33.74) |
| Energy drinks                                             | 1/43           | 1/63              | 1.47            | 1.33            | (0.07-25.40) |
| Selenium-containing supplements                           | 10/34          | 23/41             | 0.52            | 0.53            | (0.21-1.33)  |
| <b>Clinical history</b>                                   |                |                   |                 |                 |              |
| Any trauma requesting medical evaluation                  | 16/28          | 19/45             | 1.35            | 1.52            | (0.65-3.55)  |
| Head trauma                                               | 7/37           | 6/58              | 1.83            | 1.89            | (0.58-6.16)  |
| Trunk trauma                                              | 5/39           | 5/59              | 1.51            | 1.63            | (0.43-5.17)  |
| Arm trauma                                                | 19/34          | 14/50             | 1.05            | 1.11            | (0.44-2.83)  |
| Any fracture                                              | 19/25          | 24/40             | 1.27            | 1.26            | (0.55-2.86)  |
| Head fracture                                             | 1/43           | 0/64              | -               | -               |              |
| Trunk fracture                                            | 2/42           | 4/60              | 0.71            | 0.70            | (0.12-4.12)  |
| Arm fracture                                              | 17/27          | 20/44             | 1.39            | 1.39            | (0.60-3.21)  |

|                            |       |       |      |      |             |
|----------------------------|-------|-------|------|------|-------------|
| Electric shock trauma      | 0/44  | 1/63  | -    | -    |             |
| Previous Polio vaccine     | 15/29 | 28/36 | 0.67 | 0.64 | (0.26-1.56) |
| Previous spinal anesthesia | 12/32 | 11/53 | 1.81 | 1.73 | (0.66-4.54) |
| Ever been blood donor      | 7/37  | 14/50 | 0.68 | 0.72 | (0.26-2.01) |
| Any surgery                | 36/8  | 52/12 | 1.04 | 0.93 | (0.33-2.62) |
| with general anesthesia    | 12/24 | 11/41 | 1.82 | 1.80 | (0.67-4.86) |
| ALS cases in the family    | 1/43  | 2/62  | 0.72 | 0.59 | (0.05-7.22) |

<sup>a</sup>Crude model; <sup>b</sup>Model adjusted by age, and educational attainment; <sup>c</sup>Section missing for 16 subjects due to pilot version of the questionnaire. Analysis performed in 92 participants only (29 cases/63 controls);

<sup>d</sup>Recommended alcohol units (two alcohol units in men, one unit in women) used as cutpoints.

**Table S5.** Odds ratio (OR) with 95% confidence interval (CI) of ALS risk according to leisure activities and other lifestyle factors in men.

| Factor                             | Cases<br>(y/n) | Controls<br>(y/n) | OR <sup>a</sup> | OR <sup>b</sup> | (95% CI)     |
|------------------------------------|----------------|-------------------|-----------------|-----------------|--------------|
| Hunting                            | 4/47           | 6/65              | 0.92            | 1.15            | (0.29-4.63)  |
| Fishing                            | 18/33          | 36/35             | 0.53            | 0.50            | (0.23-1.10)  |
| Using lead                         | 16/35          | 31/40             | 0.59            | 0.59            | (0.27-1.29)  |
| Using lead in fishermen only       | 16/2           | 31/5              | 1.19            | 1.30            | (0.20-8.55)  |
| Painting                           | 5/46           | 10/61             | 0.66            | 0.81            | (0.25-2.67)  |
| Use of oil paints                  | 2/49           | 5/66              | 0.54            | 0.71            | (0.12-4.07)  |
| Use of oil paints in painters only | 2/3            | 5/5               | 0.67            | 0.96            | (0.07-12.67) |
| Model-making                       | 5/46           | 8/63              | 0.86            | 1.01            | (0.29-3.50)  |
| Gardening                          | 22/29          | 36/35             | 0.74            | 0.85            | (0.40-1.81)  |
| Any use of pesticides?             | 12/39          | 15/56             | 1.15            | 1.12            | (0.46-2.73)  |
| Using pesticides for gardening?    | 10/41          | 12/59             | 1.20            | 1.18            | (0.45-3.11)  |
| Using herbicides for gardening?    | 10/41          | 8/63              | 1.92            | 1.96            | (0.69-5.58)  |
| Using fungicides for gardening?    | 4/47           | 7/64              | 0.78            | 0.81            | (0.11-3.04)  |
| Photograph darkroom printing?      | 5/46           | 19/52             | 0.30            | 0.32            | (0.10-0.98)  |
| Play Sports                        | 28/23          | 45/26             | 0.70            | 0.66            | (0.29-1.46)  |
| Play competitive sports            | 8/43           | 18/53             | 0.55            | 0.41            | (0.15-1.08)  |
| Play soccer                        | 14/37          | 21/50             | 0.90            | 0.67            | (0.29-1.59)  |
| Play competitive soccer            | 6/45           | 6/65              | 1.44            | 1.10            | (0.32-3.78)  |
| Play volleyball                    | 1/50           | 4/67              | 0.34            | 0.27            | (0.03-2.58)  |
| Play competitive volleyball        | 0/51           | 3/68              | -               | -               |              |
| Cycling                            | 5/46           | 7/64              | 0.99            | 1.02            | (0.29-3.59)  |
| Competitive cycling                | 1/50           | 4/67              | 0.34            | 0.31            | (0.03-3.01)  |
| Swimming                           | 2/49           | 5/66              | 0.54            | 0.47            | (0.08-2.91)  |
| Competitive swimming               | 0/51           | 1/70              | -               | -               |              |
| Skiing                             | 4/47           | 5/66              | 1.12            | 1.65            | (0.38-7.20)  |
| Competitive skiing                 | 0/51           | 0/71              | -               | -               |              |
| Play athletics                     | 5/46           | 12/59             | 0.53            | 0.61            | (0.19-1.93)  |
| Competitive athletics              | 0/51           | 4/67              | -               | -               |              |
| Play tennis                        | 2/49           | 6/65              | 0.44            | 0.48            | (0.09-2.65)  |
| Play competitive tennis            | 1/50           | 0/71              | -               | -               |              |

<sup>a</sup>Crude model; <sup>b</sup>Model adjusted by age, and educational attainment.

**Table S6.** Odds ratio (OR) with 95% confidence interval (CI) of ALS risk according to leisure activities and other lifestyle factors in women.

| Factor                             | Cases<br>(y/n) | Controls<br>(y/n) | OR <sup>a</sup> | OR <sup>b</sup> | (95% CI)     |
|------------------------------------|----------------|-------------------|-----------------|-----------------|--------------|
| Hunting                            | 0/44           | 0/64              | -               | -               |              |
| Fishing                            | 2/42           | 1/63              | 3.00            | 3.42            | (0.38-41.58) |
| Using lead                         | 0/44           | 1/63              | -               | -               |              |
| Using lead in fishermen only       | 0/2            | 1/0               | -               | -               |              |
| Painting                           | 1/43           | 3/61              | 0.47            | 0.47            | (0.04-4.97)  |
| Use of oil paints                  | 0/44           | 3/61              | -               | -               |              |
| Use of oil paints in painters only | 0/1            | 3/0               | -               | -               |              |
| Model-making                       | 2/42           | 0/64              | -               | -               |              |
| Gardening                          | 20/24          | 29/39             | 1.01            | 1.07            | (0.49-2.36)  |
| Any use of pesticides?             | 8/36           | 13/751            | 0.87            | 0.90            | (0.33-2.46)  |
| Using pesticides for gardening?    | 6/38           | 9/55              | 0.96            | 1.03            | (0.33-3.18)  |
| Using herbicides for gardening?    | 6/38           | 5/59              | 1.86            | 1.89            | (0.53-6.73)  |
| Using fungicides for gardening?    | 3/41           | 5/59              | 0.86            | 0.95            | (0.21-4.40)  |
| Photograph darkroom printing?      | 0/44           | 5/59              | -               | -               |              |
| Play Sports                        | 10/34          | 18/46             | 0.75            | 0.86            | (0.31-2.35)  |
| Play competitive sports            | 2/42           | 4/60              | 0.71            | 0.74            | (0.12-4.66)  |
| Play soccer                        | 0/44           | 0/64              | -               | -               |              |
| Play competitive soccer            | 0/44           | 0/64              | -               | -               |              |
| Play volleyball                    | 4/40           | 7/57              | 0.81            | 0.88            | (0.22-3.49)  |
| Play competitive volleyball        | 1/43           | 1/63              | 1.47            | 1.72            | (0.09-33.55) |
| Cycling                            | 0/44           | 0/64              | -               | -               |              |
| Competitive cycling                | 0/44           | 0/64              | -               | -               |              |
| Swimming                           | 3/41           | 2/62              | 2.27            | 3.11            | (0.43-22.66) |
| Competitive swimming               | 1/43           | 0/64              | -               | -               |              |
| Skiing                             | 1/43           | 2/62              | 0.72            | 0.99            | (0.08-12.60) |
| Competitive skiing                 | 0/44           | 0/64              | -               | -               |              |
| Play athletics                     | 2/42           | 4/60              | 0.71            | 0.79            | (0.13-4.74)  |
| Competitive athletics              | 0/44           | 2/62              | -               | -               |              |
| Play tennis                        | 2/42           | 1/63              | 3.00            | 4.00            | (0.33-49.13) |
| Play competitive tennis            | 0/44           | 2/62              | -               | -               |              |

<sup>a</sup>Crude model; <sup>b</sup>Model adjusted by age, and educational attainment.

**Table S7.** Odds ratio (OR) with 95% confidence interval (CI) of ALS risk according to personal characteristics and clinical factors in the Northern Italy provinces of Modena, Novara and Reggio Emilia.

| Factors                                                          | Cases<br>(y/n) | Controls<br>(y/n) | OR <sup>a</sup> | OR <sup>b</sup> | (95% CI)     |
|------------------------------------------------------------------|----------------|-------------------|-----------------|-----------------|--------------|
| <b>Personal information and habits</b>                           |                |                   |                 |                 |              |
| Dominant hand                                                    |                |                   |                 |                 |              |
| Right-handed                                                     | 65             | 105               | Ref.            |                 |              |
| Left-handed                                                      | 4              | 2                 | 3.23            | 2.89            | (0.49-16.94) |
| Ambidextrous                                                     | 7              | 7                 | 1.62            | 1.42            | (0.47-4.28)  |
| Non-right handed                                                 | 11/65          | 9/105             | 1.97            | 1.73            | (0.67-4.48)  |
| Dominant foot                                                    |                |                   |                 |                 |              |
| Right-handed                                                     | 65             | 105               | Ref.            |                 |              |
| Left-handed                                                      | 10             | 7                 | 2.31            | 2.02            | (0.71-5.74)  |
| Ambidextrous                                                     | 1              | 2                 | -               | -               |              |
| Non-right footed                                                 | 11/65          | 9/105             | 1.97            | 1.73            | (0.67-4.51)  |
| Regular use of skin cream <sup>c</sup>                           | 18/37          | 56/57             | 0.50            | 0.37            | (0.17-0.82)  |
| Having or ever had amalgam fillings <sup>c</sup>                 | 33/22          | 71/42             | 0.89            | 0.84            | (0.41-1.73)  |
| Regular use of chewing gum <sup>c</sup>                          | 14/41          | 17/96             | 1.93            | 2.04            | (0.87-4.83)  |
| Eat fish <sup>c</sup>                                            | 37/18          | 101/12            | 0.24            | 0.24            | (0.10-0.57)  |
| Eat ≥3 fish-based meals per week <sup>c</sup>                    | 2/53           | 13/100            | 0.29            | 0.29            | (0.06-1.38)  |
| Wine drinking <sup>c</sup>                                       | 38/38          | 79/35             | 0.44            | 0.45            | (0.23-0.85)  |
| Alcohol unit intake <sup>c,d</sup>                               | 9/46           | 20/93             | 0.91            | 0.91            | (0.37-2.25)  |
| Main source of drinking water                                    |                |                   |                 |                 |              |
| No preference                                                    | 26             | 38                | Ref.            | Ref.            |              |
| Municipal water                                                  | 21             | 48                | 0.64            | 0.59            | (0.28-1.23)  |
| Private wells                                                    | 3              | 1                 | 4.38            | 3.33            | (0.31-35.69) |
| Bottled water                                                    | 26             | 27                | 1.41            | 1.26            | (0.59-2.70)  |
| Current use of any private well water                            | 10/66          | 6/108             | 2.73            | 2.70            | (0.92-7.95)  |
| Ever use a private well/fountain for drinking water              | 34/42          | 39/75             | 1.56            | 1.57            | (0.84-2.96)  |
| Current use of a private well/fountain for irrigation            | 11/65          | 28/86             | 0.52            | 0.47            | (0.21-1.04)  |
| Ever smoking                                                     | 38/38          | 62/52             | 0.84            | 0.91            | (0.49-1.68)  |
| Current smoking                                                  | 5/71           | 14/100            | 0.50            | 0.50            | (0.17-1.48)  |
| Use of the following dietary supplements in the former 20 years: | 22/54          | 39/75             | 0.78            | 0.75            | (0.40-1.44)  |
| Vitamin supplements                                              | 13/63          | 23/91             | 0.82            | 0.83            | (0.38-1.81)  |
| Vitamin and mineral supplements                                  | 13/63          | 25/89             | 0.73            | 0.66            | (0.31-1.44)  |
| Aminoacidic supplements                                          | 4/72           | 2/112             | 3.11            | 3.72            | (0.57-24.30) |
| Energy drinks                                                    | 6/70           | 11/103            | 0.80            | 0.82            | (0.27-2.51)  |
| Selenium-containing supplements                                  | 17/59          | 32/82             | 0.74            | 0.75            | (0.37-1.53)  |
| <b>Clinical history</b>                                          |                |                   |                 |                 |              |
| Any trauma requesting medical evaluation                         | 31/45          | 46/68             | 1.02            | 1.13            | (0.61-2.10)  |
| Head trauma                                                      | 16/60          | 12/102            | 2.27            | 2.38            | (1.01-5.51)  |
| Trunk trauma                                                     | 9/67           | 7/107             | 2.05            | 2.08            | (0.71-6.04)  |
| Arm trauma                                                       | 14/62          | 38/76             | 0.45            | 0.47            | (0.23-0.95)  |
| Any fracture                                                     | 27/49          | 45/69             | 0.84            | 0.89            | (0.48-1.66)  |
| Head fracture                                                    | 2/74           | 0/114             | -               | -               |              |
| Trunk fracture                                                   | 5/71           | 10/104            | 0.73            | 0.80            | (0.25-2.52)  |
| Arm fracture                                                     | 20/56          | 37/77             | 0.74            | 0.75            | (0.39-1.46)  |
| Electric shock trauma                                            | 6/70           | 5/109             | 1.87            | 2.20            | (0.61-7.87)  |
| Previous Polio vaccine                                           | 34/42          | 57/57             | 0.81            | 0.77            | (0.39-1.54)  |
| Previous spinal anesthesia                                       | 21/55          | 33/81             | 0.94            | 0.96            | (0.49-1.85)  |
| Ever been blood donor                                            | 10/56          | 31/83             | 0.96            | 1.08            | (0.53-2.18)  |

|                         |       |        |      |      |              |
|-------------------------|-------|--------|------|------|--------------|
| Any surgery             | 64/12 | 100/14 | 0.75 | 0.70 | (0.29-1.68)  |
| with general anesthesia | 20/44 | 32/68  | 0.97 | 0.97 | (0.49-1.95)  |
| ALS cases in the family | 3/73  | 2/112  | 2.30 | 2.04 | (0.32-12.99) |

<sup>a</sup>Crude model; <sup>b</sup>Model adjusted by sex, age, and educational attainment; <sup>c</sup>Section missing for 22 subjects due to pilot version of the questionnaire. Analysis performed in 168 participants only (55 cases/113 controls);

<sup>d</sup>Recommended alcohol units (two alcohol units in men, one unit in women) used as cutpoints.

**Table S8.** Odds ratio (OR) with 95% confidence interval (CI) of ALS risk according to personal characteristics and clinical factors in the Southern Italy province of Catania.

| Factors                                                          | Cases<br>(y/n) | Controls<br>(y/n) | OR <sup>a</sup> | OR <sup>b</sup> | (95% CI)      |
|------------------------------------------------------------------|----------------|-------------------|-----------------|-----------------|---------------|
| <b>Personal information and habits</b>                           |                |                   |                 |                 |               |
| Dominant hand                                                    |                |                   |                 |                 |               |
| Right-handed                                                     | 18             | 19                | Ref.            |                 |               |
| Left-handed                                                      | 0              | 2                 | -               | -               |               |
| Ambidextrous                                                     | 1              | 0                 | -               | -               |               |
| Non-right handed                                                 | 1/18           | 2/19              | 0.53            | 0.39            | (0.02-7.80)   |
| Dominant foot                                                    |                |                   |                 |                 |               |
| Right-handed                                                     | 18             | 18                | Ref.            |                 |               |
| Left-handed                                                      | 1              | 3                 | 0.33            | 0.31            | (0.02-5.04)   |
| Ambidextrous                                                     | 0              | 0                 | -               | -               |               |
| Non-right footed                                                 | 1/18           | 3/18              | 0.33            | 0.31            | (0.02-5.04)   |
| Regular use of skin cream <sup>c</sup>                           | 7/6            | 10/11             | 1.28            | 3.00            | (0.40-22.85)  |
| Having or ever had amalgam fillings <sup>c</sup>                 | 9/4            | 8/13              | 3.66            | 5.83            | (0.76-44.42)  |
| Regular use of chewing gum <sup>c</sup>                          | 2/11           | 1/21              | 3.64            | 3.19            | (0.17-59.35)  |
| Eat fish <sup>c</sup>                                            | 11/2           | 19/2              | 0.58            | 0.22            | (0.01-4.80)   |
| Eat ≥3 fish-based meals per week <sup>c</sup>                    | 4/9            | 5/16              | 1.42            | 0.89            | (0.10-8.29)   |
| Wine drinking <sup>c</sup>                                       | 5/14           | 6/15              | 0.89            | 0.53            | (0.11-2.67)   |
| Alcohol unit intake <sup>c,d</sup>                               | 1/12           | 1/20              | 1.67            | 0.75            | (0.03-16.65)  |
| Main source of drinking water                                    |                |                   |                 |                 |               |
| No preference                                                    | 8              | 8                 | Ref.            | Ref.            |               |
| Municipal water                                                  | 3              | 7                 | 0.43            | 0.20            | (0.02-1.67)   |
| Private wells                                                    | 1              | 2                 | 0.50            | 1.26            | (0.07-21.70)  |
| Bottled water                                                    | 7              | 4                 | 1.75            | 1.45            | (0.16-13.31)  |
| Current use of any private well water                            | 2/17           | 3/18              | 0.71            | 1.03            | (0.11-9.41)   |
| Ever use a private well/fountain for drinking water              | 4/15           | 7/14              | 0.53            | 0.62            | (0.13-3.01)   |
| Current use of a private well/fountain for irrigation            | 3/16           | 2/19              | 1.78            | 1.74            | (0.18-17.21)  |
| Ever smoking                                                     | 11/8           | 3/18              | 8.25            | 20.32           | (1.32-311.71) |
| Current smoking                                                  | 6/13           | 1/20              | 9.23            | 9.59            | (0.78-118.07) |
| Use of the following dietary supplements in the former 20 years: | 4/15           | 7/14              | 0.53            | 0.69            | (0.14-3.36)   |
| Vitamin supplements                                              | 4/15           | 6/15              | 0.67            | 1.00            | (0.19-5.27)   |
| Vitamin and mineral supplements                                  | 3/16           | 2/19              | 1.78            | 1.24            | (0.16-9.69)   |
| Aminoacidic supplements                                          | 0/19           | 0/21              | -               | -               |               |
| Energy drinks                                                    | 1/18           | 0/20              | -               | -               |               |
| Selenium-containing supplements                                  | 6/13           | 5/16              | 1.48            | 1.51            | (0.32-7.13)   |
| <b>Clinical history</b>                                          |                |                   |                 |                 |               |
| Any trauma requesting medical evaluation                         | 4/15           | 3/18              | 1.60            | 2.48            | (0.31-19.58)  |
| Head trauma                                                      | 3/16           | 1/20              | 3.75            | 7.28            | (0.43-122.82) |
| Trunk trauma                                                     | 0/19           | 1/20              | -               | -               |               |
| Arm trauma                                                       | 2/17           | 1/20              | 2.35            | 5.64            | (0.29-108.42) |
| Any fracture                                                     | 7/12           | 9/12              | 0.78            | 0.80            | (0.20-3.23)   |
| Head fracture                                                    | 1/18           | 1/20              | 1.11            | 0.60            | (0.03-11.85)  |
| Trunk fracture                                                   | 1/18           | 0/21              | -               | -               |               |
| Arm fracture                                                     | 6/13           | 8/13              | 0.75            | 0.91            | (0.22-3.77)   |
| Electric shock trauma                                            | 1/18           | 0/20              | -               | -               |               |
| Previous Polio vaccine                                           | 7/12           | 9/12              | 0.78            | 0.44            | (0.10-1.96)   |
| Previous spinal anesthesia                                       | 3/16           | 3/18              | 1.12            | 1.80            | (0.26-12.56)  |
| Ever been blood donor                                            | 4/15           | 6/15              | 0.67            | 1.13            | (0.20-6.38)   |
| Any surgery                                                      | 12/7           | 13/8              | 1.05            | 0.88            | (0.20-3.81)   |
| with general anesthesia                                          | 3/9            | 3/10              | 1.11            | 1.81            | (0.20-16.44)  |

|                         |      |      |   |   |
|-------------------------|------|------|---|---|
| ALS cases in the family | 2/17 | 0/21 | - | - |
|-------------------------|------|------|---|---|

<sup>a</sup>Crude model; <sup>b</sup>Model adjusted by sex, age, and educational attainment; <sup>c</sup>Section missing for 6 subjects due to pilot version of the questionnaire. Analysis performed in 34 participants only (13 cases/21 controls);

<sup>d</sup>Recommended alcohol units (two alcohol units in men, one unit in women) used as cutpoints.

**Table S9.** Odds ratio (OR) with 95% confidence interval (CI) of ALS risk according to leisure activities and other lifestyle factors in the Northern Italy provinces of Modena, Novara and Reggio Emilia.

| Factor                             | Cases<br>(y/n) | Controls<br>(y/n) | OR <sup>a</sup> | OR <sup>b</sup> | (95% CI)    |
|------------------------------------|----------------|-------------------|-----------------|-----------------|-------------|
| Hunting                            | 2/74           | 6/108             | 0.49            | 0.49            | (0.09-2.62) |
| Fishing                            | 15/61          | 33/81             | 0.60            | 0.51            | (0.23-1.14) |
| Using lead                         | 11/65          | 28/86             | 0.52            | 0.46            | (0.19-1.09) |
| Using lead in fishermen only       | 11/4           | 28/5              | 0.49            | 1.02            | (0.15-6.90) |
| Painting                           | 0/76           | 11/103            | -               | -               |             |
| Use of oil paints                  | 0/76           | 7/107             | -               | -               |             |
| Use of oil paints in painters only | 0/0            | 7/4               | -               | -               |             |
| Model-making                       | 3/73           | 6/108             | 0.74            | 0.72            | (0.16-3.15) |
| Gardening                          | 34/42          | 61/53             | 0.70            | 0.78            | (0.43-1.42) |
| Any use of pesticides?             | 17/59          | 27/87             | 0.93            | 0.98            | (0.48-1.99) |
| Using pesticides for gardening?    | 13/63          | 20/94             | 0.97            | 1.06            | (0.48-2.34) |
| Using herbicides for gardening?    | 13/63          | 12/102            | 1.75            | 1.86            | (0.78-4.43) |
| Using fungicides for gardening?    | 6/70           | 11/103            | 0.80            | 0.95            | (0.33-2.78) |
| Photograph darkroom printing?      | 5/71           | 24/90             | 0.26            | 0.26            | (0.09-0.75) |
| Play Sports                        | 29/47          | 54/60             | 0.69            | 0.71            | (0.35-1.42) |
| Play competitive sports            | 9/67           | 18/96             | 0.72            | 0.66            | (0.26-1.66) |
| Play soccer                        | 11/65          | 19/95             | 0.85            | 0.73            | (0.29-1.81) |
| Play competitive soccer            | 4/110          | 6/70              | 2.36            | 2.36            | (0.60-9.27) |
| Play volleyball                    | 4/72           | 8/106             | 0.74            | 0.67            | (0.18-2.46) |
| Play competitive volleyball        | 1/75           | 4/110             | 0.37            | 0.29            | (0.03-2.81) |
| Cycling                            | 5/71           | 7/107             | 1.08            | 1.09            | (0.31-3.84) |
| Competitive cycling                | 1/75           | 4/110             | 0.37            | 0.33            | (0.03-3.11) |
| Swimming                           | 4/72           | 6/108             | 1.00            | 1.16            | (0.27-5.02) |
| Competitive swimming               | 0/76           | 1/113             | -               | -               |             |
| Skiing                             | 5/71           | 7/107             | 1.08            | 1.79            | (0.50-6.48) |
| Competitive skiing                 | 0/76           | 0/114             | -               | -               |             |
| Play athletics                     | 6/70           | 15/99             | 0.57            | 0.72            | (0.25-2.03) |
| Competitive athletics              | 0/75           | 5/109             | -               | -               |             |
| Play tennis                        | 3/73           | 7/107             | 0.63            | 0.74            | (0.17-3.17) |
| Play competitive tennis            | 1/75           | 0/114             | -               | -               |             |

<sup>a</sup>Crude model; <sup>b</sup>Model adjusted by sex, age, and educational attainment.

**Table S10.** Odds ratio (OR) with 95% confidence interval (CI) of ALS risk according to leisure activities and other lifestyle factors in the Southern Italy province of Catania.

| Factor                             | Cases<br>(y/n) | Controls<br>(y/n) | OR <sup>a</sup> | OR <sup>b</sup> | (95% CI)     |
|------------------------------------|----------------|-------------------|-----------------|-----------------|--------------|
| Hunting                            | 2/17           | 0/21              | -               | -               |              |
| Fishing                            | 5/14           | 4/17              | 1.52            | 0.57            | (0.07-4.46)  |
| Using lead                         | 5/14           | 4/17              | 1.52            | 0.57            | (0.07-4.46)  |
| Using lead in fishermen only       | 5/0            | 4/0               | -               | -               |              |
| Painting                           | 6/13           | 2/19              | 4.38            | 3.84            | (0.41-36.24) |
| Use of oil paints                  | 2/17           | 1/20              | 2.35            | 3.20            | (0.15-68.27) |
| Use of oil paints in painters only | 2/4            | 1/1               | 0.50            | - <sup>c</sup>  |              |
| Model-making                       | 4/15           | 2/19              | 2.53            | 1.26            | (0.12-13.25) |
| Gardening                          | 8/11           | 4/17              | 3.09            | 3.44            | (0.70-16.84) |
| Any use of pesticides?             | 3/16           | 1/20              | 3.75            | 3.89            | (0.28-54.59) |
| Using pesticides for gardening?    | 3/16           | 1/20              | 3.75            | 3.89            | (0.28-54.59) |
| Using herbicides for gardening?    | 3/16           | 1/20              | 3.75            | 3.89            | (0.28-54.59) |
| Using fungicides for gardening?    | 1/18           | 1/20              | 1.11            | 1.70            | (0.07-39.99) |
| Photograph darkroom printing?      | 0/19           | 0/21              | -               | -               |              |
| Play Sports                        | 9/10           | 9/12              | 1.20            | 1.09            | (0.25-4.70)  |
| Play competitive sports            | 1/18           | 4/17              | 0.24            | 0.21            | (0.02-2.37)  |
| Play soccer                        | 3/16           | 2/19              | 1.78            | 0.66            | (0.06-7.10)  |
| Play competitive soccer            | 0/19           | 2/19              | -               | -               |              |
| Play volleyball                    | 1/18           | 3/18              | 0.33            | 0.37            | (0.03-4.98)  |
| Play competitive volleyball        | 0/19           | 0/21              | -               | -               |              |
| Cycling                            | 0/19           | 0/21              | -               | -               |              |
| Competitive cycling                | 0/19           | 0/21              | -               | -               |              |
| Swimming                           | 1/18           | 1/20              | 1.11            | 2.05            | (0.09-45.27) |
| Competitive swimming               | 1/18           | 0/21              | -               | -               |              |
| Skiing                             | 0/19           | 0/21              | -               | -               |              |
| Competitive skiing                 | 0/19           | 0/21              | -               | -               |              |
| Play athletics                     | 1/18           | 1/20              | 1.11            | 0.74            | (0.04-14.49) |
| Competitive athletics              | 0/19           | 1/20              | -               | -               |              |
| Play tennis                        | 1/18           | 0/20              | -               | -               |              |
| Play competitive tennis            | 0/19           | 0/20              | -               | -               |              |

<sup>a</sup>Crude model; <sup>b</sup>Model adjusted by sex, age, and educational attainment; <sup>c</sup>Too high estimate.

**Table S11.** Odds ratio (OR) with 95% confidence interval (CI) of ALS risk according to personal characteristics and clinical factors without carriers of *C9orf72* mutation.

| Factor                                                    | Cases<br>(y/n) | Controls<br>(y/n) | OR <sup>a</sup> | OR <sup>b</sup> | (95% CI)     |
|-----------------------------------------------------------|----------------|-------------------|-----------------|-----------------|--------------|
| <b>Personal information and habits</b>                    |                |                   |                 |                 |              |
| Dominant hand                                             |                |                   |                 |                 |              |
| Right-handed                                              | 77             | 124               | Ref.            |                 |              |
| Left-handed                                               | 4              | 4                 | 1.61            | 1.53            | (0.36-6.55)  |
| Ambidextrous                                              | 7              | 8                 | 1.84            | 1.85            | (0.63-5.41)  |
| Non-right handed                                          | 12/77          | 11/124            | 1.76            | 1.76            | (0.74-4.18)  |
| Dominant foot                                             |                |                   |                 |                 |              |
| Right-handed                                              | 78             | 123               | Ref.            |                 |              |
| Left-handed                                               | 10             | 10                | 1.58            | 1.55            | (0.60-4.00)  |
| Ambidextrous                                              | 1              | 2                 | 0.79            | 0.81            | (0.07-9.20)  |
| Non-right handed                                          | 11/78          | 12/123            | 1.45            | 1.42            | (0.59-3.45)  |
| Regular use of skin cream <sup>c</sup>                    | 24/39          | 66/68             | 0.63            | 0.56            | (0.28-1.12)  |
| Having or ever had amalgam fillings <sup>c</sup>          | 38/25          | 79/55             | 1.06            | 1.13            | (0.59-2.17)  |
| Regular use of chewing gum <sup>c</sup>                   | 14/49          | 18/116            | 1.84            | 1.98            | (0.86-4.56)  |
| Eat fish <sup>c</sup>                                     | 45/18          | 120/14            | 0.29            | 0.30            | (0.13-0.67)  |
| Eat ≥3 fish-based meals per week <sup>c</sup>             | 6/57           | 18/116            | 0.68            | 0.63            | (0.23-1.73)  |
| Wine drinking <sup>c</sup>                                | 40/49          | 85/50             | 0.48            | 0.45            | (0.25-0.82)  |
| Alcohol unit drinking <sup>c,d</sup>                      | 9/54           | 21/113            | 0.90            | 0.96            | (0.40-2.33)  |
| Main source of drinking water                             |                |                   |                 |                 |              |
| No preference                                             | 32             | 46                | Ref.            | Ref.            |              |
| Municipal water                                           | 21             | 55                | 0.55            | 0.48            | (0.24-0.97)  |
| Private wells                                             | 4              | 3                 | 1.92            | 1.46            | (0.30-7.19)  |
| Bottled water                                             | 32             | 31                | 1.48            | 1.22            | (0.61-2.46)  |
| Current use of any private well water                     | 10/79          | 9/126             | 1.77            | 1.67            | (0.64-4.36)  |
| Have ever used a private well/fountain for drinking water | 36/53          | 46/89             | 1.31            | 1.29            | (0.72-2.30)  |
| Current use of a private well/fountain for irrigation     | 13/76          | 30/105            | 0.60            | 0.56            | (0.27-1.18)  |
| Ever smoking                                              | 46/43          | 65/70             | 1.15            | 1.23            | (0.69-2.19)  |
| Current smoking                                           | 10/79          | 15/120            | 1.01            | 1.03            | (0.42-2.19)  |
| Use of dietary supplements in the former 20 years:        | 24/65          | 46/89             | 0.71            | 0.68            | (0.37-1.24)  |
| Vitamin supplements                                       | 15/74          | 29/106            | 0.74            | 0.74            | (0.36-1.51)  |
| Vitamin and mineral supplements                           | 15/74          | 27/108            | 0.81            | 0.72            | (0.35-1.48)  |
| Aminoacidic supplements                                   | 4/85           | 2/133             | 3.13            | 3.43            | (0.56-21.16) |
| Energy drinks                                             | 7/82           | 11/124            | 0.96            | 1.02            | (0.35-2.94)  |
| Selenium-containing supplements                           | 21/68          | 37/98             | 0.82            | 0.87            | (0.45-1.66)  |
| <b>Clinical history</b>                                   |                |                   |                 |                 |              |
| Any trauma requesting medical evaluation                  | 33/56          | 49/86             | 1.03            | 1.19            | (0.66-2.14)  |
| Head trauma                                               | 19/70          | 13/122            | 2.55            | 3.00            | (1.35-6.67)  |
| Trunk trauma                                              | 8/81           | 8/127             | 1.57            | 1.61            | (0.57-4.59)  |
| Arm trauma                                                | 14/75          | 39/96             | 0.46            | 0.48            | (0.24-0.97)  |
| Any fracture                                              | 33/56          | 54/81             | 0.88            | 0.90            | (0.51-1.59)  |
| Head fracture                                             | 3/86           | 1/134             | 4.67            | 4.37            | (0.43-44.74) |
| Trunk fracture                                            | 6/86           | 10/125            | 0.90            | 1.02            | (0.34-3.04)  |
| Arm fracture                                              | 25/64          | 45/90             | 0.78            | 0.77            | (0.42-1.41)  |
| Electric shock trauma                                     | 6/83           | 5/130             | 1.88            | 1.90            | (0.54-6.76)  |
| Previous Polio vaccine                                    | 37/52          | 66/69             | 0.74            | 0.73            | (0.40-1.33)  |
| Previous spinal anesthesia                                | 24/65          | 36/99             | 1.02            | 1.04            | (0.56-1.94)  |
| Ever been blood donor                                     | 23/66          | 37/98             | 0.92            | 1.06            | (0.56-2.02)  |
| Any surgery                                               | 73/16          | 113/22            | 0.89            | 0.86            | (0.41-1.81)  |
| with general anesthesia                                   | 23/50          | 35/78             | 1.03            | 1.04            | (0.54-1.98)  |

<sup>a</sup>Crude model; <sup>b</sup>Model adjusted by sex, age, and educational attainment; <sup>c</sup>Section missing for 27 subjects due to pilot version of the questionnaire. Analysis performed in 197 participants only (63 cases/134 controls); <sup>d</sup>Recommended alcohol units (two alcohol units in men, one unit in women) used as cutpoints.

**Table S12.** Odds ratio (OR) with 95% confidence interval (CI) of ALS risk according to leisure activities and other lifestyle factors without carriers of *C9orf72* mutation.

| Factor                             | Cases<br>(y/n) | Controls<br>(y/n) | OR <sup>a</sup> | OR <sup>b</sup> | (95% CI)     |
|------------------------------------|----------------|-------------------|-----------------|-----------------|--------------|
| Hunting                            | 4/85           | 6/129             | 1.01            | 1.15            | (0.29-4.51)  |
| Fishing                            | 18/71          | 37/98             | 0.67            | 0.58            | (0.28-1.23)  |
| Using lead                         | 14/75          | 32/103            | 0.60            | 0.53            | (0.24-1.18)  |
| Using lead in fishermen only       | 14/4           | 32/5              | 0.55            | 0.77            | (0.14-4.22)  |
| Painting                           | 5/84           | 13/122            | 0.56            | 0.67            | (0.22-2.02)  |
| Use of oil paints                  | 2/87           | 8/127             | 0.36            | 0.45            | (0.09-2.24)  |
| Use of oil paints in painters only | 2/3            | 8/5               | 0.42            | 0.89            | (0.05-14.74) |
| Model-making                       | 7/82           | 8/127             | 1.36            | 1.58            | (0.52-4.77)  |
| Gardening                          | 39/50          | 65/70             | 0.84            | 0.94            | (0.54-1.63)  |
| Any use of pesticides?             | 19/70          | 28/107            | 1.04            | 1.08            | (0.55-2.12)  |
| Using pesticides for gardening?    | 15/74          | 21/114            | 1.10            | 1.17            | (0.56-2.47)  |
| Using herbicides for gardening?    | 15/74          | 13/122            | 1.90            | 1.93            | (0.85-4.38)  |
| Using fungicides for gardening?    | 6/83           | 12/123            | 0.74            | 0.86            | (0.30-2.47)  |
| Photograph darkroom printing?      | 3/86           | 24/111            | 0.16            | 0.16            | (0.04-0.57)  |
| Play Sports                        | 35/55          | 63/72             | 0.74            | 0.81            | (0.42-1.53)  |
| Play competitive sports            | 10/79          | 22/113            | 0.65            | 0.56            | (0.24-1.30)  |
| Play soccer                        | 13/76          | 21/114            | 0.93            | 0.77            | (0.33-1.81)  |
| Play competitive soccer            | 6/83           | 6/129             | 1.55            | 1.27            | (0.37-4.29)  |
| Play volleyball                    | 5/84           | 11/124            | 0.67            | 0.69            | (0.22-2.18)  |
| Play competitive volleyball        | 1/88           | 4/131             | 0.37            | 0.32            | (0.03-3.00)  |
| Cycling                            | 5/84           | 7/128             | 1.09            | 1.11            | (0.32-3.86)  |
| Competitive cycling                | 1/88           | 4/131             | 0.37            | 0.33            | (0.04-3.16)  |
| Swimming                           | 4/85           | 7/128             | 0.86            | 1.02            | (0.24-4.13)  |
| Competitive swimming               | 1/88           | 1/134             | 1.52            | 2.04            | (0.12-34.38) |
| Skiing                             | 5/84           | 7/128             | 1.09            | 1.78            | (0.50-6.30)  |
| Competitive skiing                 | 0/89           | 0/135             | -               | -               |              |
| Play athletics                     | 5/84           | 16/119            | 0.44            | 0.49            | (0.17-1.44)  |
| Competitive athletics              | 0/89           | 6/129             | -               | -               |              |
| Play tennis                        | 3/86           | 7/128             | 0.64            | 0.78            | (0.19-3.31)  |
| Play competitive tennis            | 1/88           | 0/135             | -               | -               |              |

<sup>a</sup>Crude model; <sup>b</sup>Adjusted by sex, age, and educational attainment; CI: confidence interval; OR: odds ratio.
